# Supplementary material
Source: PubMed Central journal article supplement (PMC4125398)
Supplement: 9825f448dd3afc26ddaa18c4191ee99e_genetics.114.164434-4.pdf [file 9825f448dd3afc26ddaa18c4191ee99e_genetics.114.164434-4.pdf]

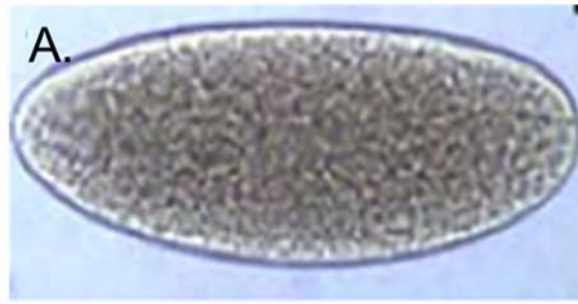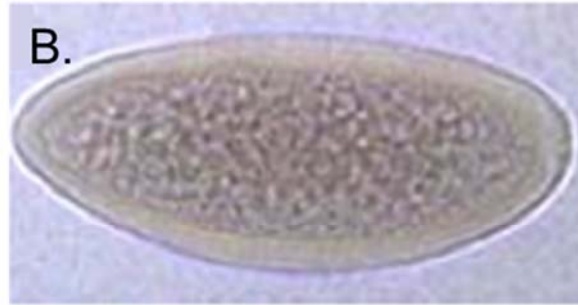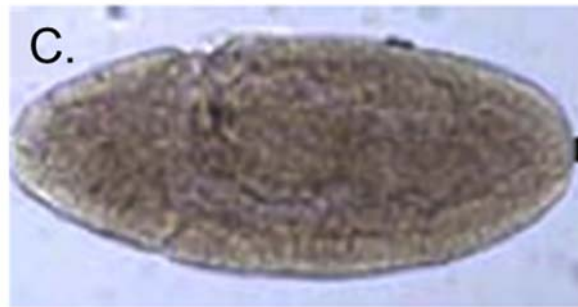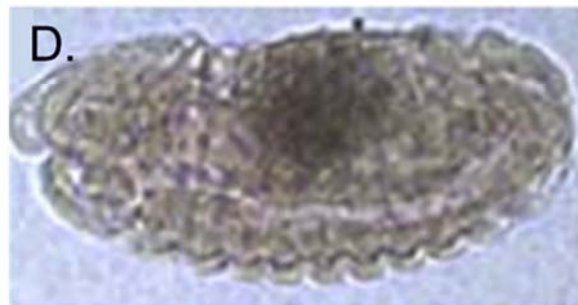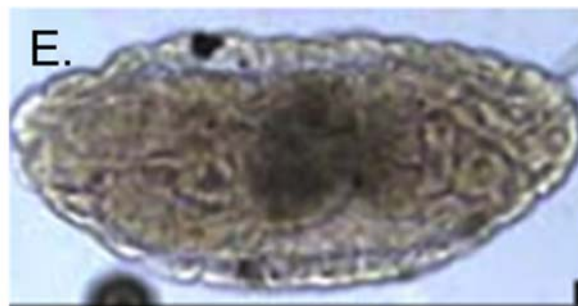

**Figure S1** *In situ* hybridization to embryos with a sense-strand probe for *SRm160* transcripts produces no signal (A) Pre-cellular blastoderm; (B) Cellularized blastoderm; (C) gastrulating embryo; (D) embryo following germ-band retraction; (E) late stage embryo (approximate 16 hr).
