# Supplementary material
Source: PubMed Central journal article supplement (PMC4125398)
Supplement: 1246760614e81a2f87451943400b8420_genetics.114.164434-2.pdf [file 1246760614e81a2f87451943400b8420_genetics.114.164434-2.pdf]

**Table S1 Complementation of *SRm160* alleles**

| Male                          | <u>C52</u><br><u>TM6B</u>                                           | <u>GE25979</u><br><u>TM6B</u>                                                                                                                       | <u>G18603</u><br><u>TM6C</u>                                                                 |
|-------------------------------|---------------------------------------------------------------------|-----------------------------------------------------------------------------------------------------------------------------------------------------|----------------------------------------------------------------------------------------------|
| Female                        |                                                                     |                                                                                                                                                     |                                                                                              |
| <u>B103*</u><br><u>TM6B</u>   | Lethal, no <i>Tb</i> <sup>+</sup> larvae or pupae                   | <i>Tb</i> <sup>+</sup> pupae<br>52-66% female survival<br>80-100% male survival<br>Females sterile, males fertile<br>Slightly reduced vaginal teeth | Viable, normal<br>6% female survival<br>100% male survival<br>Females sterile, males fertile |
| <u>C52</u><br><u>TM6B</u>     | Lethal, no <i>Tb</i> <sup>+</sup> larvae or pupae                   | Occasional <i>Tb</i> <sup>+</sup> 3 <sup>rd</sup> instar larvae, no <i>Tb</i> <sup>+</sup> pupae.                                                   | Viable, normal                                                                               |
| <u>GE25979</u><br><u>TM6B</u> | Lethal                                                              | Lethal, no <i>Tb</i> <sup>+</sup>                                                                                                                   | Viable, normal larvae or pupae<br>Females sterile                                            |
| <u>G18603</u><br><u>TM6C</u>  | Viable<br>Reduced vaginal teeth<br>Females sterile<br>Males fertile | Viable, no visible defects<br>Females sterile (few/no eggs)                                                                                         | Lethal                                                                                       |

\*The *B103* chromosome used in these tests was previously “cleansed” of potential second-site lethal mutations, as described in Materials and Methods.
