# Supplementary material
Source: PubMed Central journal article supplement (PMC4125398)
Supplement: a36ea67a17540f1bfb07ce14c543294e_genetics.114.164434-3.pdf [file a36ea67a17540f1bfb07ce14c543294e_genetics.114.164434-3.pdf]

**Table S3** Rescue of *da>SRm160<sup>GE25979</sup>* induced lethality by mutations at *Doa*

| Parents : Male x Female                    |                                        | Surviving F1                                                    |        |       |
|--------------------------------------------|----------------------------------------|-----------------------------------------------------------------|--------|-------|
|                                            |                                        | Genotype                                                        | Female | Males |
| <i>w; da-GAL4 Pr Doa<sup>HD</sup>/TM6</i>  | <i>w; SRm160<sup>GE25979</sup>/TM6</i> | <i>da-GAL4 Pr Doa<sup>HD</sup> / SRm160<sup>GE25979</sup> :</i> | 54     | 2     |
| <i>w; da-GAL4</i><br>(result from Table 2) | <i>w; SRm160<sup>GE25979</sup>/TM6</i> | <i>da-GAL4 / SRm160<sup>GE25979</sup></i>                       | 0      | 0     |
