# Supplementary material
Source: PubMed Central journal article supplement (PMC4125398)
Supplement: ada8fc340f49dc8fcdd00b038eaec0e0_genetics.114.164434-5.pdf [file ada8fc340f49dc8fcdd00b038eaec0e0_genetics.114.164434-5.pdf]

**Table S2 Phenotypes of *SRm160* over-expression and RNA-interference with various *GAL4* driver elements**

| Tissue                  | <i>GAL4</i> driver                               | <i>SRm160</i> allele / Phenotype*                                   |                                               |
|-------------------------|--------------------------------------------------|---------------------------------------------------------------------|-----------------------------------------------|
|                         |                                                  | <i>GE25979</i> (Over-expression)                                    | RNAi lines <i>CG 11274 R-1</i> and <i>R-3</i> |
| Ubiquitous              | <i>da-GAL4</i>                                   | Lethal                                                              | Lethal                                        |
| Dorsal wing surface     | <i>MS1096-GAL4</i>                               | No phenotype                                                        | Un-expanded wings                             |
| Eye disc                | <i>GMR-GAL4</i>                                  | Rough eyes, male lethal at 29°C.                                    | Slightly rough eyes                           |
| Genital (+ other) discs | <i>esg-GAL4</i>                                  | Loss of external analia in 10% of males<br>Unelongated testes (25°) | No phenotype                                  |
| Pan-neural              | <i>elav-GAL4</i><br>( <i>C155, G1-9, G1-10</i> ) | No phenotype                                                        | No phenotype                                  |
| Fatbody                 | <i>Lsp2-GAL4</i>                                 | No phenotype                                                        | No phenotype                                  |
| Salivary gland          | <i>SG-GAL4</i>                                   | No phenotype                                                        | No phenotype                                  |

\*: Phenotypes were observed in crosses at both 25°C and 29°C, except as indicated.
