# Supplementary material
Source: PubMed Central journal article supplement (PMC4125398)
Supplement: b5ddd0d92b115c406de0196fa5bff277_genetics.114.164434-1.pdf [file b5ddd0d92b115c406de0196fa5bff277_genetics.114.164434-1.pdf]

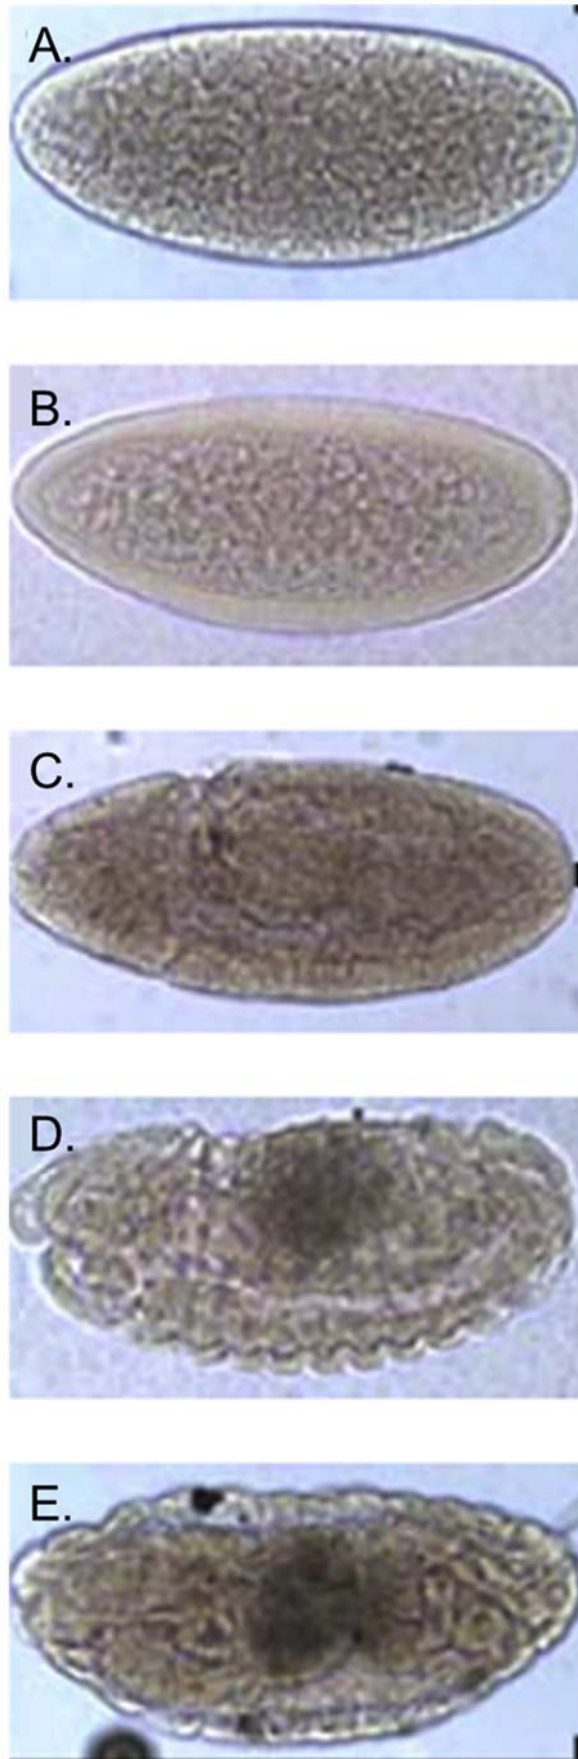

**Figure S1** *In situ* hybridization to embryos with a sense-strand probe for *SRm160* transcripts produces no signal (A) Pre-cellular blastoderm; (B) Cellularized blastoderm; (C) gastrulating embryo; (D) embryo following germ-band retraction; (E) late stage embryo (approximate 16 hr).

**Table S1 Complementation of *SRm160* alleles**

| Male                          | <u>C52</u><br><u>TM6B</u>                                           | <u>GE25979</u><br><u>TM6B</u>                                                                                                                       | <u>G18603</u><br><u>TM6C</u>                                                                 |
|-------------------------------|---------------------------------------------------------------------|-----------------------------------------------------------------------------------------------------------------------------------------------------|----------------------------------------------------------------------------------------------|
| Female                        |                                                                     |                                                                                                                                                     |                                                                                              |
| <u>B103*</u><br><u>TM6B</u>   | Lethal, no <i>Tb</i> <sup>+</sup> larvae or pupae                   | <i>Tb</i> <sup>+</sup> pupae<br>52-66% female survival<br>80-100% male survival<br>Females sterile, males fertile<br>Slightly reduced vaginal teeth | Viable, normal<br>6% female survival<br>100% male survival<br>Females sterile, males fertile |
| <u>C52</u><br><u>TM6B</u>     | Lethal, no <i>Tb</i> <sup>+</sup> larvae or pupae                   | Occasional <i>Tb</i> <sup>+</sup> 3 <sup>rd</sup> instar larvae, no <i>Tb</i> <sup>+</sup> pupae.                                                   | Viable, normal                                                                               |
| <u>GE25979</u><br><u>TM6B</u> | Lethal                                                              | Lethal, no <i>Tb</i> <sup>+</sup>                                                                                                                   | Viable, normal larvae or pupae<br>Females sterile                                            |
| <u>G18603</u><br><u>TM6C</u>  | Viable<br>Reduced vaginal teeth<br>Females sterile<br>Males fertile | Viable, no visible defects<br>Females sterile (few/no eggs)                                                                                         | Lethal                                                                                       |

\*The *B103* chromosome used in these tests was previously “cleansed” of potential second-site lethal mutations, as described in Materials and Methods.

**Table S2 Phenotypes of *SRm160* over-expression and RNA-interference with various *GAL4* driver elements**

| Tissue                  | <i>GAL4</i> driver                               | <i>SRm160</i> allele / Phenotype*                                   |                                               |
|-------------------------|--------------------------------------------------|---------------------------------------------------------------------|-----------------------------------------------|
|                         |                                                  | <i>GE25979</i> (Over-expression)                                    | RNAi lines <i>CG 11274 R-1</i> and <i>R-3</i> |
| Ubiquitous              | <i>da-GAL4</i>                                   | Lethal                                                              | Lethal                                        |
| Dorsal wing surface     | <i>MS1096-GAL4</i>                               | No phenotype                                                        | Un-expanded wings                             |
| Eye disc                | <i>GMR-GAL4</i>                                  | Rough eyes, male lethal at 29°C.                                    | Slightly rough eyes                           |
| Genital (+ other) discs | <i>esg-GAL4</i>                                  | Loss of external analia in 10% of males<br>Unelongated testes (25°) | No phenotype                                  |
| Pan-neural              | <i>elav-GAL4</i><br>( <i>C155, G1-9, G1-10</i> ) | No phenotype                                                        | No phenotype                                  |
| Fatbody                 | <i>Lsp2-GAL4</i>                                 | No phenotype                                                        | No phenotype                                  |
| Salivary gland          | <i>SG-GAL4</i>                                   | No phenotype                                                        | No phenotype                                  |

\*: Phenotypes were observed in crosses at both 25°C and 29°C, except as indicated.

**Table S3** Rescue of *da>SRm160<sup>GE25979</sup>* induced lethality by mutations at *Doa*

| Parents : Male x Female                    |                                        | Surviving F1                                                    |        |       |
|--------------------------------------------|----------------------------------------|-----------------------------------------------------------------|--------|-------|
|                                            |                                        | Genotype                                                        | Female | Males |
| <i>w; da-GAL4 Pr Doa<sup>HD</sup>/TM6</i>  | <i>w; SRm160<sup>GE25979</sup>/TM6</i> | <i>da-GAL4 Pr Doa<sup>HD</sup> / SRm160<sup>GE25979</sup> :</i> | 54     | 2     |
| <i>w; da-GAL4</i><br>(result from Table 2) | <i>w; SRm160<sup>GE25979</sup>/TM6</i> | <i>da-GAL4 / SRm160<sup>GE25979</sup></i>                       | 0      | 0     |
